# Supplementary material for: Altered hepatic lipid droplet morphology and lipid metabolism in fasted Plin2-null mice
Source: PubMed Central journal article supplement (PMC10716011; doi:10.1016/j.jlr.2023.100461), 2023-10-14
Supplement: mmc1.pdf [file mmc1.pdf]

## Supplemental Fig. S1

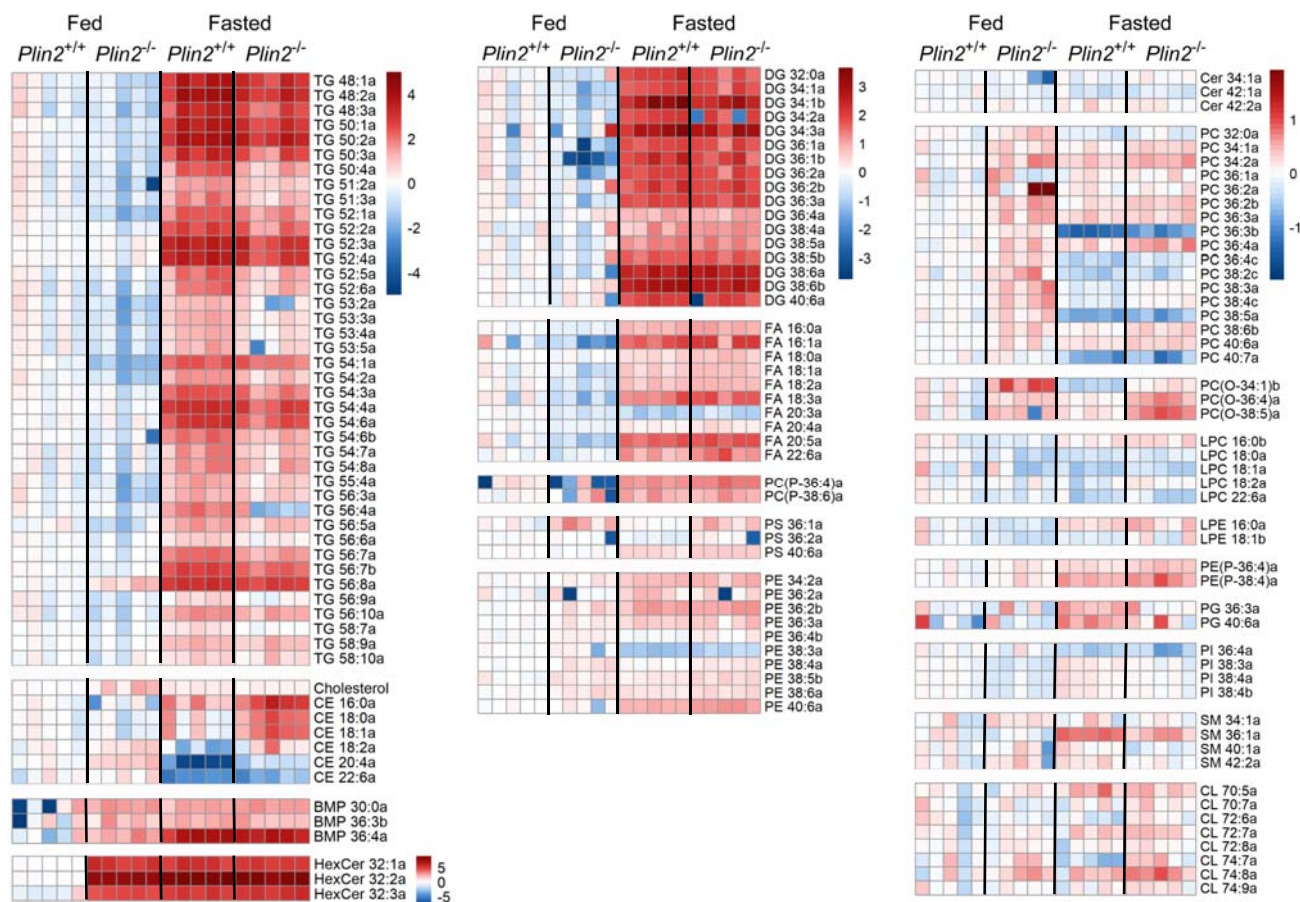

## Supplemental Fig. S1.

Detailed lipid analysis of hepatic lipid species in *Plin2*<sup>+/+</sup> and *Plin2*<sup>-/-</sup> mice fed or fasted for 24 h (n=5 pr group). Data is presented as log fold-change (log<sub>2</sub>FC) relative to the mean for fed *Plin2*<sup>+/+</sup> mice. Measured lipid classes:

cardiolipin (CL), ceramide (Cer), cholesterol, cholesteryl ester (CE), diacylglycerol (DG), ether-linked phosphatidylcholine (PCO), free fatty acid (FA), hexosylceramide (HexCer), monoacylglycerophosphate (BMP), lysophosphatidylcholine (LPC), lysophosphatidylethanolamine (LPE), phosphatidylcholine (PC), phosphatidylcholine plasmalogen PCP, phosphatidylglycerol (PG), sphingomyelin (SM), phosphatidylethanolamine (PE), phosphatidylethanolamine plasmalogen (PEP), phosphatidylglycerol (PG), phosphatidylinositol (PI), phosphatidylserine (PS), and triglyceride (TG).

## Supplemental Fig. S2

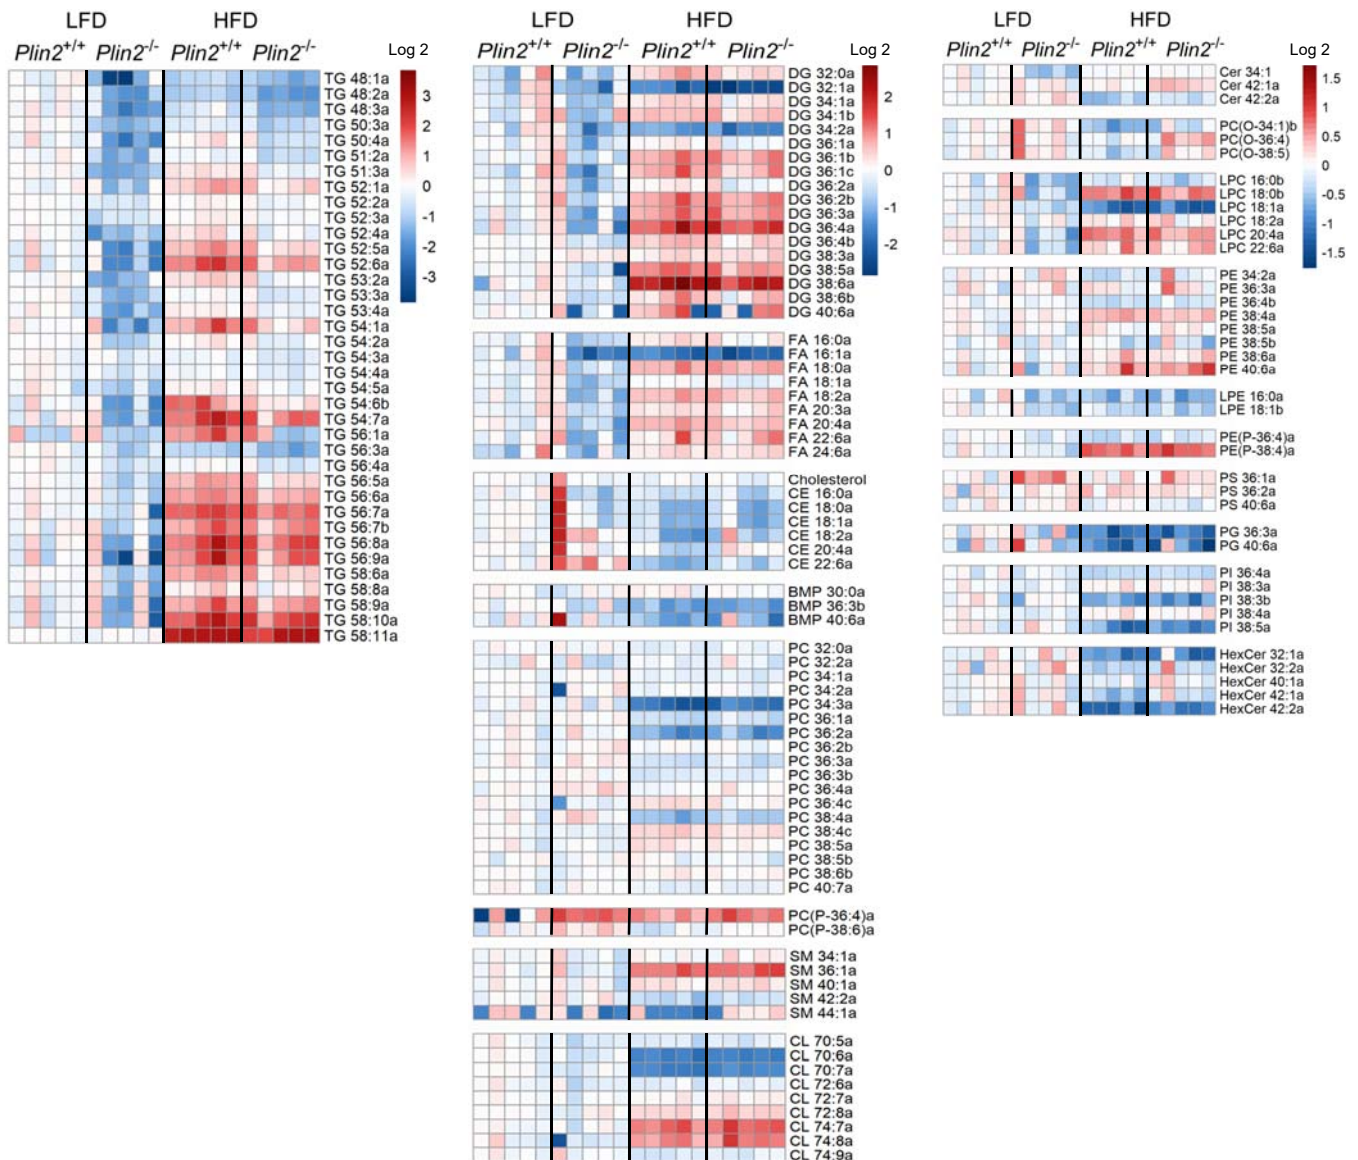

## Supplemental Fig. S2.

Detailed lipid analysis of hepatic lipid species in *Plin2*<sup>+/+</sup> and *Plin2*<sup>-/-</sup> mice fed a low-fat diet (LFD) or a high fat diet (HFD) for 10 weeks until 18 weeks of age (n=5 per group). Data is presented as log fold-change (log<sub>2</sub>FC) relative to the mean for LFD fed *Plin2*<sup>+/+</sup> mice.

Measured lipid classes:

cardiolipin (CL), ceramide (Cer), cholesterol, cholesteryl ester (CE), diacylglycerol (DG), ether-linked phosphatidylcholine (PCO), free fatty acid (FA), hexosylceramide (HexCer), lysophosphatidylcholine (LPC), lysophosphatidylethanolamine (LPE), monoacylglycerophosphate (BMP), phosphatidylcholine (PC), phosphatidylcholine plasmalogen PCP, phosphatidylethanolamine (PE), phosphatidylethanolamine plasmalogen (PEP), phosphatidylglycerol (PG), phosphatidylinositol (PI), phosphatidylserine (PS), sphingomyelin (SM), and triglycerides (TG).

## Supplemental Fig. S3

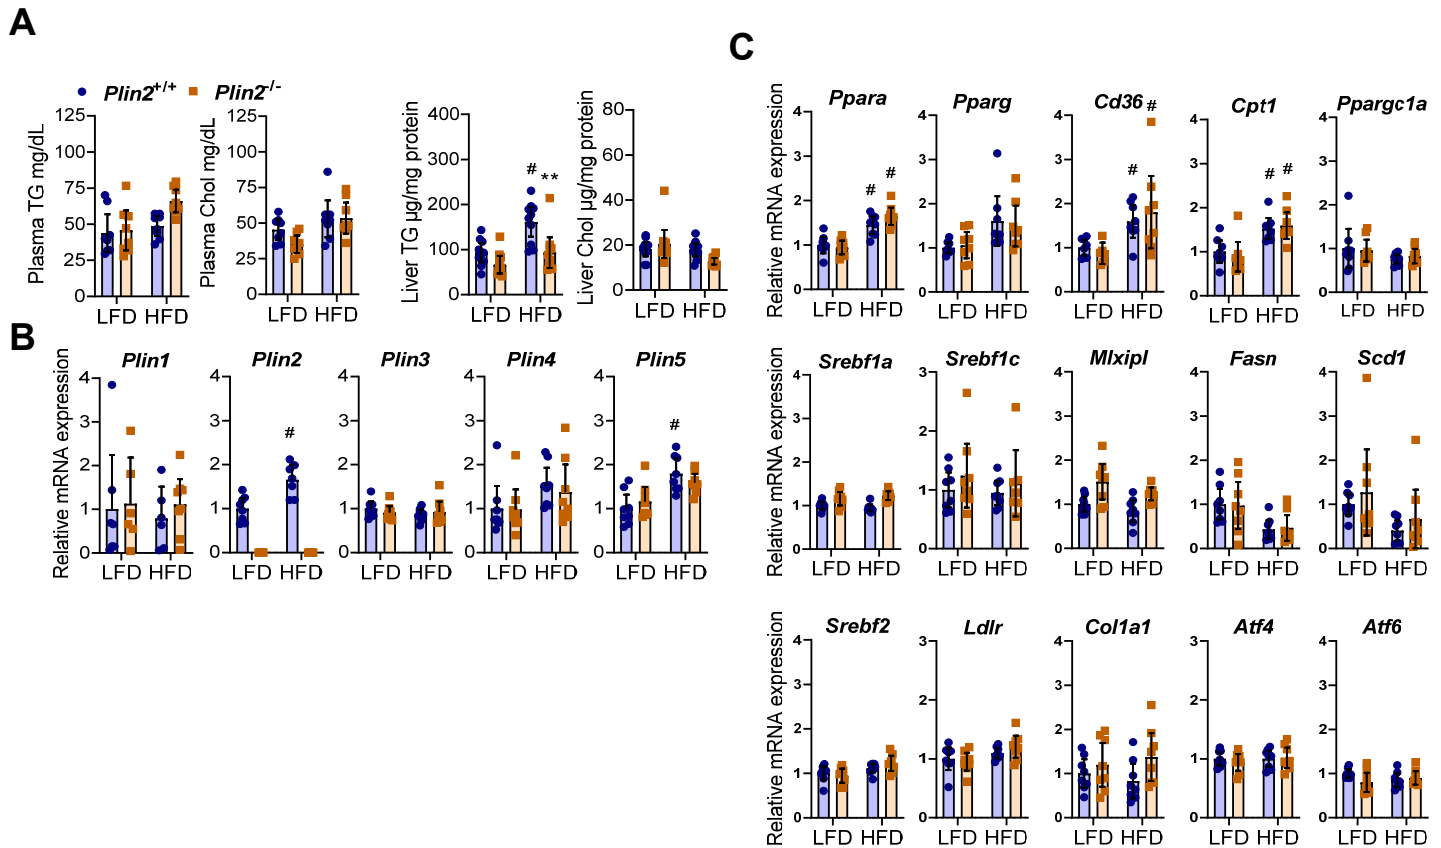

### Supplemental Fig. S3. Lipid levels and hepatic mRNA expression in mice fed LFD or HFD for 10 weeks

Female *Plin2*<sup>+/+</sup> and *Plin2*<sup>-/-</sup> mice were fed low-fat diet (LFD) or high-fat diet (HFD) for 10 weeks from 8 weeks of age until 18 weeks of age. Number of individuals: *Plin2*<sup>+/+</sup> LFD (n=8), *Plin2*<sup>+/+</sup> HFD (n=10), *Plin2*<sup>-/-</sup> LFD (n=6), *Plin2*<sup>-/-</sup> HFD (n=10).

**A)** Plasma and hepatic triacylglycerides (TAG) and total cholesterol (Chol) levels (n=8).

**B)** Hepatic expression of *Plin1*, *Plin2*, *Plin3*, *Plin4* and *Plin5* mRNAs (n=8 pr group).

**C)** Hepatic expression of mRNAs involved in FA metabolism (*Ppara*, *Pparg*, *Cd36*, *Cpt1*, *Ppargc1a*), lipogenesis (*Srebf1a*, *Srebf1c*, *ChREBP*, *Fasn*, *Scd1*), cholesterol metabolism (*Srebf2*, *Ldlr*), fibrosis (*Colla1*), and ER stress (*Atf4* and *Atf6*) (n=8 pr group).

Statistical testing was done with two-way ANOVA and Tuckey test for multiple comparisons. # indicate statistical difference between fed and fasted mice of the same genotype. \*\*\*p < 0.001 indicate difference between *Plin2*<sup>+/+</sup> and *Plin2*<sup>-/-</sup> mice under the same feeding condition. Data in graphs are shown as means ± 95% confidence interval.

## Supplemental Tables

Supplemental Table 1. Primers used for RT-qPCR

| Gene name       | Accession      | Forward primer         | Reverse primer          | Product size | Intron length |
|-----------------|----------------|------------------------|-------------------------|--------------|---------------|
| <i>Atf4</i>     | NM_009716.3    | TGGATGATGGCTTGGCCAGT   | TTCTCCAACATCCAATCTGTCCC | 112          | 2             |
| <i>Atf6</i>     | NM_001081304.1 | TGCCACCAGAAGTATGGGTTTC | ACTGACAAGCAGACTCTCGG    | 83           | 15287         |
| <i>Cd36</i>     | NM_001159557.1 | AGGCATTCTCATGCCAGTCG   | TGTACACAGTGGTGCCTGTT    | 119          | 8174          |
| <i>Coll1a1</i>  | NM_007742.4    | CTGACGCATGGCCAAGAAGAC  | CCTCGGGTTTCCACGTCTCA    | 88           | 1465          |
| <i>Cpt1a</i>    | NM_013495.2    | CCCAGCTGTCAAAGATACCGT  | GCTGTCATGCGTTGGAAGTC    | 84           | 3807          |
| <i>Fasn</i>     | NM_007988.3    | CTTCGGCTGCTGTTGGAAGTC  | GTGTTTCGTTCTCGGAGTGAG   | 80           | 1005          |
| <i>Ldlr</i>     | NM_010700.3    | GACTGCAAGGACATGAGCGA   | TGTCCAAGCTGATGCACTCC    | 103          | 1860          |
| <i>Mlxipl</i>   | NM_021455.4    | TGCAGCCCAGCCTAGATGAC   | AGCTGGGGGACTCTATGTAGTT  | 102          | 4495          |
| <i>Mpdz</i>     | NM_001305286.1 | GACTCACACACAGGCGTTA    | TCTTGCTGATGACCCGTGAC    | 105          | 563           |
| <i>Plin1</i>    | NM_001113471.1 | ACCTGGAGGAAAAGATCCCG   | TTCGAAGGCGGGTAGAGATG    | 87           | 1316          |
| <i>Plin2</i>    | NM_007408.3    | GGGCTAGACAGGATGGAGGA   | CACATCCTTCGCCCCAGTTA    | 99           | 2215          |
| <i>Plin3</i>    | NM_025836.3    | CGAAGCTCAAGCTGCTATGG   | TCACCATCCCATACGTGGAAC   | 98           | 1147          |
| <i>Plin4</i>    | NM_020568.3    | ACCAACTCACAGATGGCAGG   | AGGCATCTTCACTGCTGGTC    | 109          | 1213          |
| <i>Plin5</i>    | NM_001077348.1 | GGTGAAGACACCACCCTAGC   | CCACCACTCGATTACCACA     | 115          | 568           |
| <i>Ppara</i>    | NM_001113418.1 | ACTACGGAGTTCACGCATGT   | GTCGTACACCAGCTTCAGCC    | 74           | 1710          |
| <i>Pparg</i>    | NM_001127330.1 | TTGCTGTGGGGATGTCTCAC   | AACAGCTTCTCCTTCTCGGC    | 70           | 12003         |
| <i>Ppard</i>    | NM_011145.3    | ACATGGAATGTGGGGTGTGC   | CGAGCTTCATGCGGATTGTC    | 108          | 1590          |
| <i>Pparcg1a</i> | NM_008904.2    | AGTCCATACACAACCGCAG    | CCCTGGGGTCATTGGTGA      | 94           | 4355          |
| <i>Scd1</i>     | NM_009127.4    | GAGGCGAGCAACTGACTATC   | GGTGGTTCGTGAAGAAGTGG    | 71           | 625           |
| <i>Srebf1a</i>  | NM_001313979.1 | GGCCGAGATGTGCGAACTG    | GTTGTTGATGAGCTGGAGCATGT | 70           | 13195         |
| <i>Srebf1c</i>  | XM_006532716.2 | GGAGCCATGGATTGCACATTT  | CAGCATAGGGGGCGTCAAA     | 91           | 3078          |
| <i>Srebf2</i>   | NM_033218.1    | TGACTCTCGGGACATCGAC    | CACCTCCAGGGAAGGAGCTA    | 105          | 22247         |
